# Supplementary material for: Global consumption of prescription opioid analgesics between 2009-2019: a country-level observational study
Source: PubMed Central journal article supplement — eClinicalMedicine. 2021 Nov 13;42:101198. doi: 10.1016/j.eclinm.2021.101198 (PMC8599097; doi:10.1016/j.eclinm.2021.101198), 2021-11-13
Supplement: mmc1.pdf [file mmc1.pdf]

Global consumption of prescription opioid analgesics between 2009-2019

**Supplementary material**

**Table S1: IQVIA MIDAS data availability – 2009 to 2019**

| Country (market share*)  | Hospital  | Retail    | Country (market share*) | Hospital  | Retail    |
|--------------------------|-----------|-----------|-------------------------|-----------|-----------|
| ALGERIA (80%)            | -         | 2009-2019 | LEBANON (77%)           | -         | 2009-2019 |
| ARGENTINA (73%)          | -         | 2009-2019 | LITHUANIA               | 2009-2019 | 2009-2019 |
| AUSTRALIA                | 2009-2019 | 2009-2019 | LUXEMBOURG (97%)        | -         | 2009-2019 |
| AUSTRIA                  | 2009-2019 | 2009-2019 | MALAYSIA                | 2009-2019 | 2009-2019 |
| BANGLADESH (85%)         | -         | 2009-2020 | MEXICO                  | 2009-2019 | 2009-2019 |
| BELARUS                  | 2009-2019 | 2009-2019 | MOROCCO (88%)           | -         | 2009-2019 |
| BELGIUM                  | 2009-2019 | 2009-2019 | NETHERLANDS             | 2009-2019 | 2011-2019 |
| BOSNIA (75%)             | -         | 2011-2019 | NEW ZEALAND             | 2009-2019 | 2009-2019 |
| BRAZIL                   | 2009-2019 | 2009-2019 | NORWAY                  | 2009-2019 | 2009-2019 |
| BULGARIA                 | 2009-2019 | 2009-2019 | PAKISTAN (85%)          | -         | 2009-2019 |
| CANADA                   | 2009-2019 | 2009-2019 | PERU (67%)              | -         | 2009-2019 |
| CENTRAL AMERICA (77%)    | -         | 2009-2019 | PHILIPPINES             | 2009-2019 | 2009-2019 |
| CHILE (71%)              | -         | 2009-2019 | POLAND                  | 2009-2019 | 2009-2019 |
| CHINA                    | 2009-2019 | 2011-2019 | PORTUGAL                | 2010-2019 | 2009-2019 |
| COLOMBIA (71%)           | -         | 2009-2019 | PUERTO RICO             | 2009-2019 | 2009-2019 |
| CROATIA                  | 2009-2019 | 2009-2019 | ROMANIA                 | 2009-2019 | 2009-2019 |
| CZECH REPUBLIC           | 2009-2019 | 2009-2019 | RUSSIA                  | 2009-2019 | 2009-2019 |
| DENMARK                  | 2009-2019 | 2009-2019 | SAUDI ARABIA            | 2009-2019 | 2009-2019 |
| DOMINICAN REPUBLIC (78%) | -         | 2009-2019 | SERBIA (76%)            | -         | 2011-2019 |
| ECUADOR (75%)            | -         | 2009-2019 | SINGAPORE               | 2009-2019 | 2009-2019 |
| EGYPT (75%)              | -         | 2009-2019 | SLOVAKIA                | 2009-2019 | 2009-2019 |
| ESTONIA (88%)            | -         | 2009-2019 | SLOVENIA (73%)          | -         | 2009-2019 |
| FINLAND                  | 2009-2019 | 2009-2019 | SOUTH AFRICA            | 2009-2019 | 2009-2019 |
| FRANCE                   | 2009-2019 | 2009-2019 | SPAIN                   | 2009-2019 | 2009-2019 |
| FRENCH WEST AFRICA (86%) | -         | 2009-2019 | SRI LANKA (58%)         | -         | 2009-2019 |
| GERMANY                  | 2009-2019 | 2009-2019 | SWEDEN                  | 2009-2019 | 2009-2019 |
| HONG KONG (36%)          | -         | 2009-2019 | SWITZERLAND             | 2009-2019 | 2009-2019 |
| HUNGARY                  | 2009-2019 | 2009-2019 | TAIWAN                  | 2009-2019 | 2009-2019 |
| INDIA                    | 2009-2019 | 2009-2019 | THAILAND                | 2009-2019 | 2009-2019 |
| INDONESIA (31%)          | -         | 2009-2019 | TUNISIA                 | 2011-2019 | 2009-2019 |
| IRELAND                  | 2009-2019 | 2009-2019 | TURKEY                  | 2009-2019 | 2009-2019 |
| ITALY                    | 2009-2019 | 2009-2019 | UAE (45%)               | -         | 2009-2019 |
| JAPAN                    | 2009-2019 | 2009-2019 | UK                      | 2009-2019 | 2009-2019 |
| JORDAN (71%)             | -         | 2009-2019 | UKRAINE                 | 2010-2019 | 2010-2019 |
| KAZAKHSTAN               | 2009-2019 | 2009-2019 | URUGUAY (77%)           | -         | 2009-2019 |
| KOREA                    | 2009-2019 | 2009-2019 | US                      | 2009-2019 | 2009-2019 |
| KUWAIT (35%)             | -         | 2009-2019 | VENEZUELA (78%)         | -         | 2009-2019 |
| LATVIA                   | 2013-2019 | 2009-2019 | VIETNAM                 | 2009-2019 | 2009-2019 |

\*Estimated retail sector market share.

Source: IQVIA

**Table S2. Consumption rates (MME per 1,000 inhabitants per day) for methadone by country income group - 2009 & 2019**

|                    | 2009   |             |              | 2019   |              |              |
|--------------------|--------|-------------|--------------|--------|--------------|--------------|
|                    | Median | IQR         | 95% CI       | Median | IQR          | 95% CI       |
| High income        | 52.6   | 9.3 – 193.0 | 13.4 - 128.2 | 54.5   | 10.4 - 211.0 | 24.7 - 147.2 |
| Upper-middle       | 0.4    | 0.2 – 1.0   | 0.1 – 1.2    | 3.2    | 0.4 – 3.9    | 0.3 – 4.3    |
| Low & lower-middle | NA     | NA          | NA           | NA     | NA           | NA           |

CI - bootstrapped confidence intervals.

**Figure A1. Methadone consumption trends of the high-income countries with the top six highest consumption rates in 2019.**

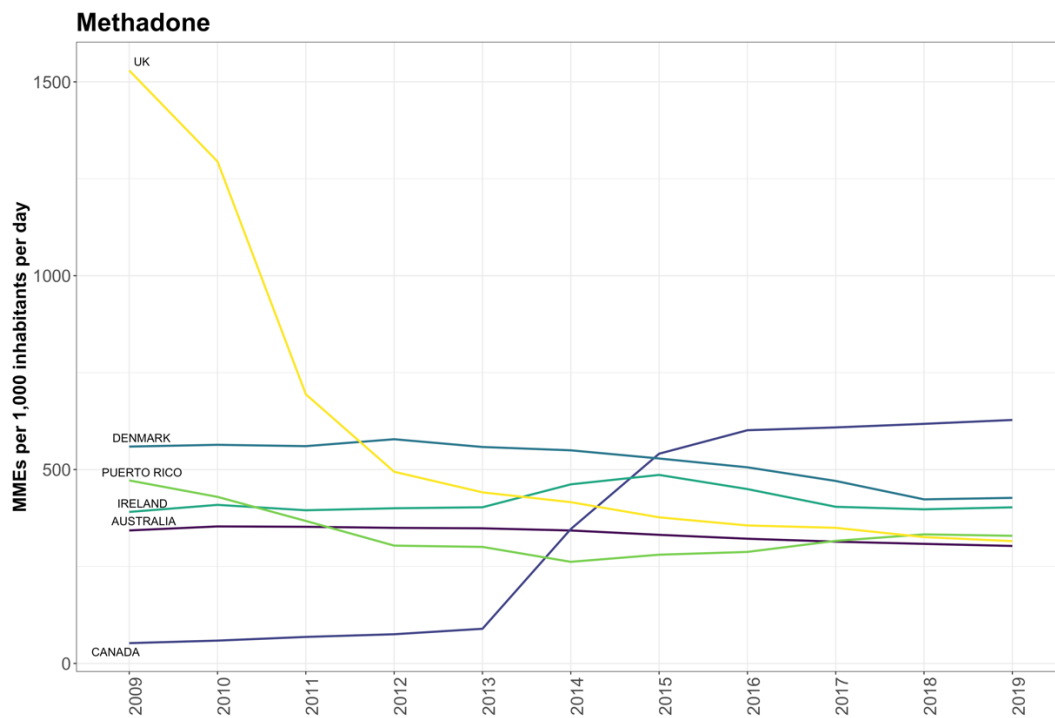



**Table S3. Change in the national opioid consumption rate between 2009 and 2019 in morphine milligram equivalents (MME) per 1,000 inhabitants per day.**

| Country            | Change in the consumption rate between 2009 & 2019 | Country          | Change in the consumption rate between 2009 & 2019 |
|--------------------|----------------------------------------------------|------------------|----------------------------------------------------|
| ALGERIA            | 4.77                                               | LITHUANIA        | 17.70                                              |
| ARGENTINA          | 14.03                                              | LUXEMBOURG       | -90.19                                             |
| AUSTRALIA          | -15.68                                             | MALAYSIA         | 0.65                                               |
| AUSTRIA            | 65.70                                              | MEXICO           | 9.78                                               |
| BANGLADESH         | 16.66                                              | MOROCCO          | 7.10                                               |
| BELARUS            | -1.76                                              | NETHERLANDS      | 264.05                                             |
| BELGIUM            | 129.92                                             | NEW ZEALAND      | -5.74                                              |
| BRAZIL             | 24.06                                              | NORWAY           | 188.69                                             |
| BULGARIA           | 33.82                                              | PAKISTAN         | 10.37                                              |
| CANADA             | -606.32                                            | PERU             | 2.82                                               |
| CHILE              | 15.33                                              | PHILIPPINES      | 1.21                                               |
| CHINA              | 10.60                                              | POLAND           | 229.48                                             |
| COLOMBIA           | 10.56                                              | PORTUGAL         | 408.97                                             |
| CROATIA            | 127.39                                             | PUERTO RICO      | -72.54                                             |
| CZECH REPUBLIC     | 175.64                                             | ROMANIA          | 54.74                                              |
| DENMARK            | -175.16                                            | RUSSIA           | -13.94                                             |
| DOMINICAN REPUBLIC | 1.67                                               | SAUDI ARABIA     | 5.66                                               |
| ECUADOR            | 11.85                                              | SINGAPORE        | 15.28                                              |
| EGYPT              | -62.01                                             | SLOVAKIA         | 44.92                                              |
| ESTONIA            | 121.59                                             | SLOVENIA         | -22.41                                             |
| FINLAND            | 36.57                                              | SOUTH AFRICA     | 63.27                                              |
| FRANCE             | 149.68                                             | SPAIN            | 500.31                                             |
| GERMANY            | -1544.96                                           | SRI LANKA        | 0.34                                               |
| HONG KONG          | 22.80                                              | SWEDEN           | -42.00                                             |
| HUNGARY            | 46.16                                              | SWITZERLAND      | 320.47                                             |
| INDIA              | 2.43                                               | TAIWAN           | 45.89                                              |
| INDONESIA          | 0.76                                               | THAILAND         | 10.57                                              |
| IRELAND            | 81.96                                              | TUNISIA          | 15.48                                              |
| ITALY              | 166.09                                             | TURKEY           | 5.75                                               |
| JAPAN              | 61.84                                              | UAE              | 0.08                                               |
| JORDAN             | -0.49                                              | UK               | 90.25                                              |
| KAZAKHSTAN         | 10.20                                              | URUGUAY          | 28.17                                              |
| KOREA              | 58.99                                              | VENEZUELA        | -9.30                                              |
| KUWAIT             | 0.53                                               | VIETNAM          | 8.44                                               |
| LATVIA             | 77.08                                              | FRENCH W. AFRICA | 5.02                                               |
| LEBANON            | -16.48                                             | CENTRAL AMERICA  | 14.95                                              |
| USA                | -1219.62                                           |                  |                                                    |

**Figure A3. Tramadol consumption trends of the upper-middle income countries (UMICs) with the top six highest consumption rates in 2019, expressed in morphine milligram equivalents per 1,000 inhabitants per day (MID).**

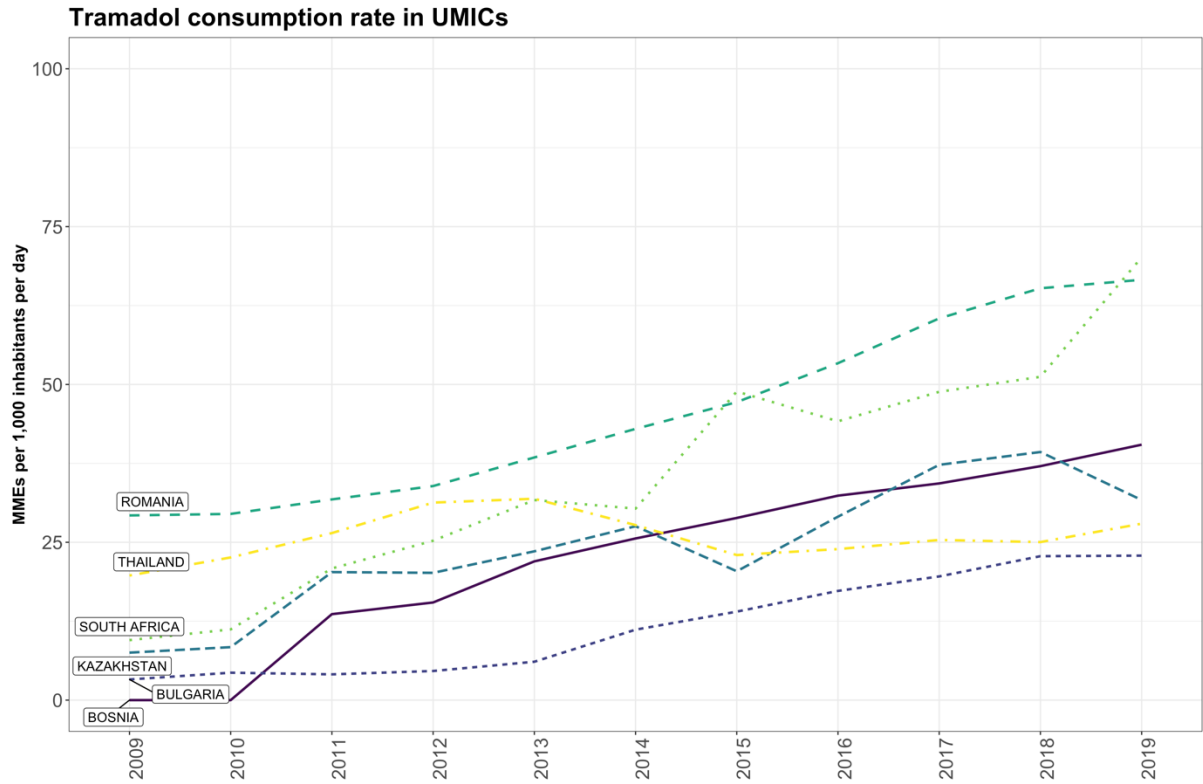

**Table S4. Fixed effects regression analysis of factors associated with opioid consumption – summary statistics from 2009 - 2019**

| <b>Variable</b>                                      | <b>All countries</b> | <b>High</b>           | <b>Upper middle</b>   | <b>Low &amp; lower-middle</b> |
|------------------------------------------------------|----------------------|-----------------------|-----------------------|-------------------------------|
| GDP per capita, median (IQR)                         | 23844 (12592 -41965) | 40004 (28797 - 50855) | 14308 (11617 - 18041) | 6712 (4373 - 9713)            |
| Imports as percentage of GDP, median (IQR)           | 39 (27 - 59)         | 41 (29 -69)           | 39 (26 - 56)          | 29 (23 - 43)                  |
| Physicians per 1,000 people, median (IQR)            | 2.5(1.6 – 3.4)       | 3.2 (2.6 – 3.8)       | 1.8 (1.3 – 2.3)       | 0.8 (0.5 – 1.0)               |
| Urban population % of total population, median (IQR) | 73 (58 - 85)         | 81 (69 - 88)          | 71 (57 - 78)          | 39 (33 - 50)                  |

Abbreviations: GDP, gross domestic product; IQR, interquartile range.

Gross domestic product (GDP) per capita in current international dollars converted by purchasing power parity (PPP) conversion factor.

## Appendix 1

### Other opioids consumed in 2009

#### *High income countries - 2009*

Morphine, codeine, tilidine, hydromorphone, dextropropoxyphene, buprenorphine, dihydrocodeine, oxymorphone, opium, pethidine, pentazocine, diamorphine, tapentadol, butorphanol, piritramide, levomethadone, nalbuphine, ketobemidone, dipipanone, trimeperidine, levorphanol, nicomorphine, ethylmorphine, dextromoramide, eptazocine and bezitramide.

#### *Upper-middle income countries*

Bucinnazine, oxycodone, methadone, dihydrocodeine, pethidine, buprenorphine, opium, trimeperidine, butorphanol, pentazocine, nalbuphine, hydrocodone, tilidine, hydromorphone, dipipanone, dihydroetorphine and dezocine.

#### *Low and lower-middle income countries*

Methadone, morphine, buprenorphine, fentanyl, butorphanol, oxycodone, pethidine, dextromoramide, opium, hydromorphone and dihydrocodeine.

### Other opioids consumed in 2019

#### *High income countries*

Morphine, codeine, tapentadol, buprenorphine, hydromorphone, tilidine, opium, dihydrocodeine, oxymorphone, butorphanol, levomethadone, diamorphine, piritramide, pethidine, nalbuphine, pentazocine, levorphanol, trimeperidine, ketobemidone, ethylmorphine, sufentanil, dipipanone, dextropropoxyphene, prosidol, eptazocine, alfentanil and bezitramide.

#### *Upper-middle income countries*

Fentanyl, methadone, dihydrocodeine, butorphanol, bucinnazine, buprenorphine, nalbuphine, tapentadol, pethidine, hydrocodone, hydromorphone, pentazocine, trimeperidine, opium, dextropropoxyphene, tilidine, eptazocine and dihydroetorphine.

#### *Low and lower-middle income countries*

Buprenorphine, fentanyl, pentazocine, dextropropoxyphene, butorphanol, opium, oxycodone, pethidine, methadone, trimeperidine, hydromorphone and oxymorphone.



## Appendix 2

**Figure A4. Opioid consumption rate by country for 2009 in MMEs per 1,000 inhabitants per day, after imputing missing hospital sector data**

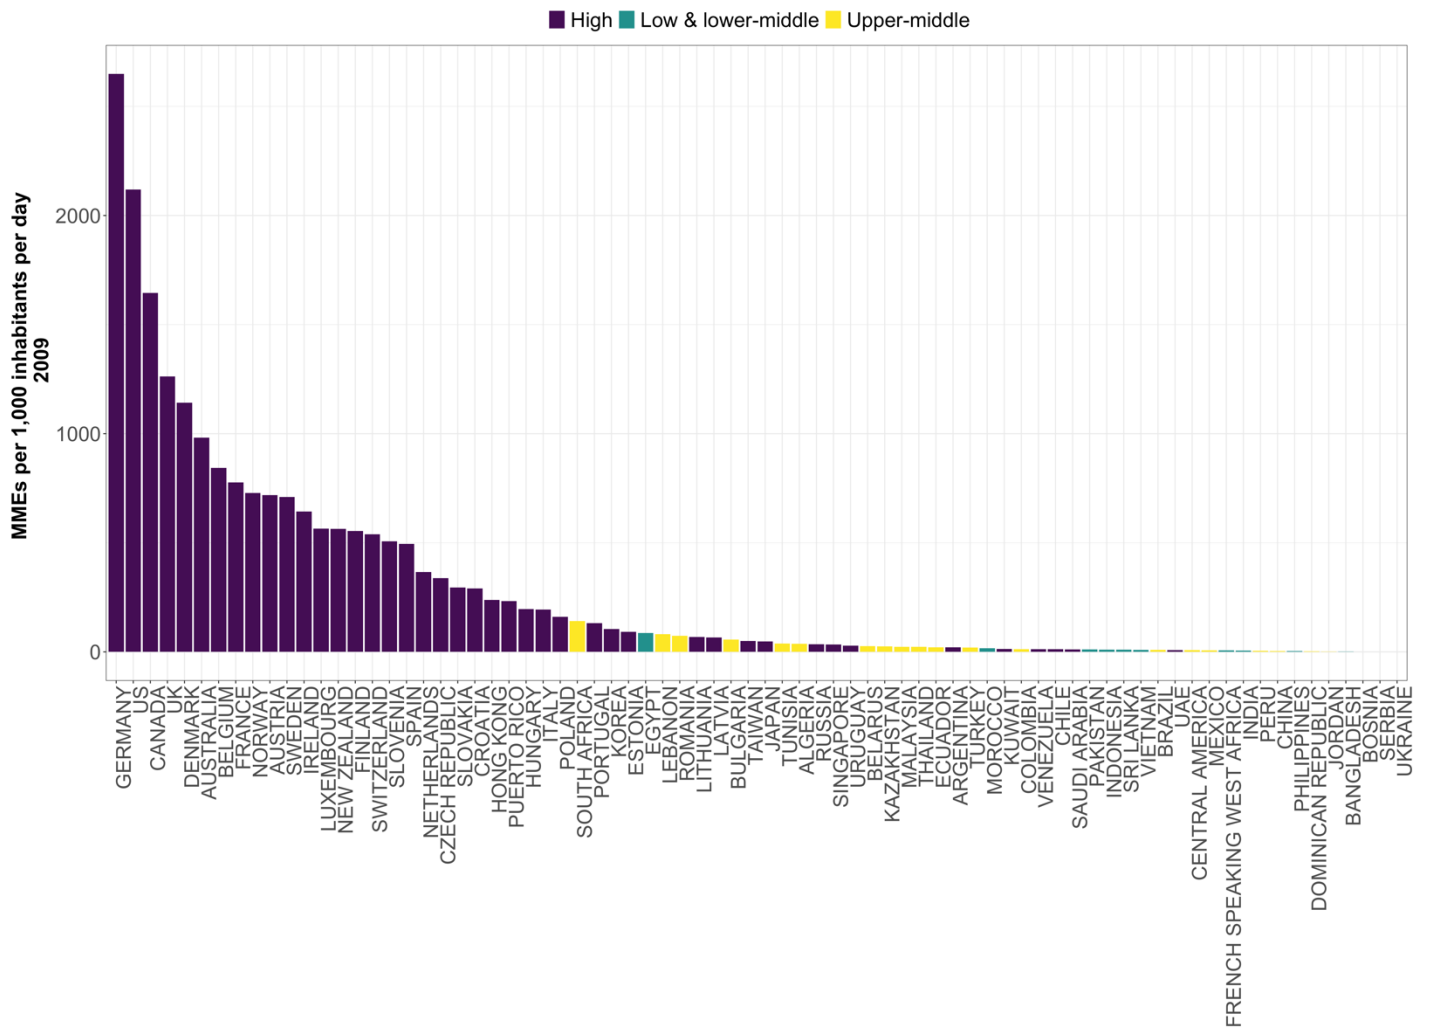

**Figure A5. Opioid consumption rate by country for 2019 in MMEs per 1,000 inhabitants per day, after imputing missing hospital sector data**

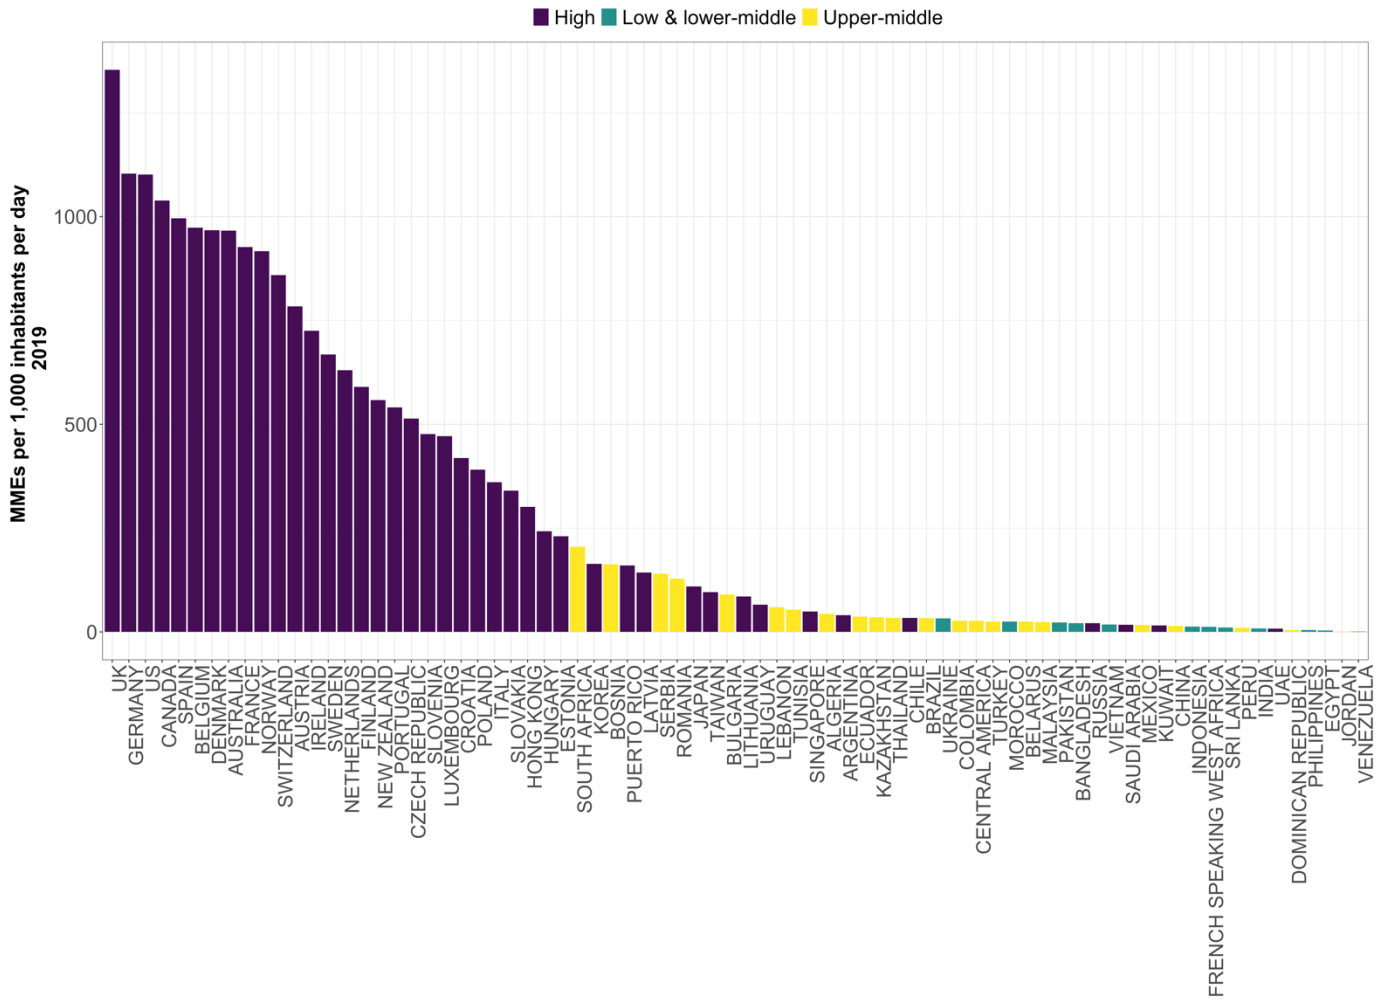

**Figure A6. Median opioid consumption rate in MMEs per 1,000 inhabitants per day by country income classification, after imputing missing hospital sector data**

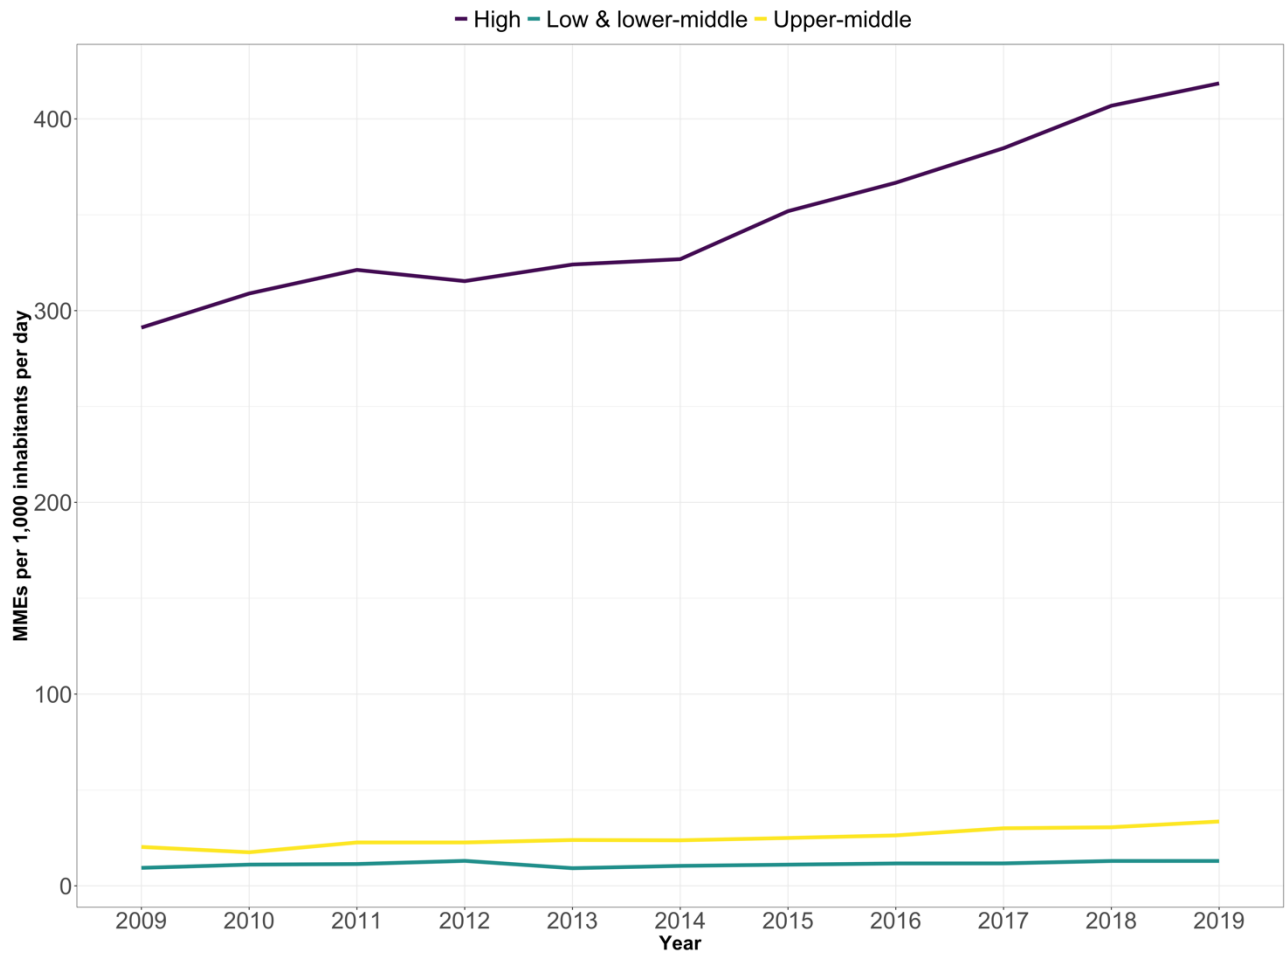

**Table S5. Fixed-effects regression analysis of factors associated with global opioid consumption (MME per capita): 2009-2019, after imputing missing hospital sector data**

| Factor                                   | Low & lower-middle   |         | Upper middle        |         | High                   |         |
|------------------------------------------|----------------------|---------|---------------------|---------|------------------------|---------|
|                                          | Coefficient(95% CI)  | P value | Coefficient(95% CI) | P value | Coefficient(95% CI)    | P value |
| GDP per capita(log)                      | -1.41(-14.5 to 11.7) | 0.815   | 22.75(3.0 to 42.5)  | 0.026   | -38.49(-150.7 to 73.7) | 0.492   |
| Imports as percentage of GDP (log)       | 8.00(-3.4 to 19.4)   | 0.149   | 16.01(0.1 to 32.0)  | 0.049   | 21.96(-66.0 to 109.9)  | 0.616   |
| Physicians (per 1,000 people)            | 2.55(1.7 to 3.4)     | 0.000   | 1.73(-4.5 to 8.0)   | 0.569   | 0.63(-20.6 to 21.9)    | 0.952   |
| Urban population (% of total population) | 0.65(-0.5 to 1.8)    | 0.253   | -0.16(-1.2 to 1.0)  | 0.758   | 12.28(-6.2 to 30.8)    | 0.188   |
| Number of countries                      | 11                   |         | 22                  |         | 41                     |         |
| Number of observations                   | 121                  |         | 242                 |         | 451                    |         |

Robust standard errors, clustered by country.

### Appendix 3

#### Search terms used on Ovid MEDLINE for rapid scoping review

| Concept 1<br>(Opioid analgesics) | AND | Concept2<br>(Prescribing/dispensing/pain management) | AND | Concept 3<br>(Utilisation/outcomes) |
|----------------------------------|-----|------------------------------------------------------|-----|-------------------------------------|
| opioid\$.ti,ab,kw                |     | prescri\$.ti,ab,kw                                   |     | Utili#ation.ti,ab,kw                |
| <b>OR</b>                        |     | <b>OR</b>                                            |     | <b>OR</b>                           |
| opiate\$.ti,ab,kw                |     | guideline\$.ti,ab,kw                                 |     | behavio?r\$.ti,ab,kw                |
| <b>OR</b>                        |     | <b>OR</b>                                            |     | <b>OR</b>                           |
| analgesi\$.ti,ab,kw              |     | guidance.ti,ab,kw                                    |     | mortality.ti,ab,kw                  |
| <b>OR</b>                        |     | <b>OR</b>                                            |     | <b>OR</b>                           |
| narcotic\$.ti,ab,kw              |     | regulat\$.ti,ab,kw                                   |     | death\$.ti,ab,kw                    |
|                                  |     | <b>OR</b>                                            |     | <b>OR</b>                           |
|                                  |     | polic\$.ti,ab,kw                                     |     | fatalit\$.ti,ab,kw                  |
|                                  |     | <b>OR</b>                                            |     | <b>OR</b>                           |
|                                  |     | pain.ti,ab,kw                                        |     | morbidity.ti,ab,kw                  |
|                                  |     | <b>OR</b>                                            |     | <b>OR</b>                           |
|                                  |     | pain management.ti,ab,kw                             |     | dependence.ti,ab,kw                 |
|                                  |     |                                                      |     |                                     |
|                                  |     | <b>OR</b>                                            |     | <b>OR</b>                           |
|                                  |     | palliative.ti,ab,kw                                  |     | addiction.ti,ab,kw                  |
